# Supplementary material for: Construction of a branched ZnO–TiO2nanorod array heterostructure for enhancing the photovoltaic properties in quantum dot-sensitized solar cells
Source: Royal Society of Chemistry journal article supplement (doi:10.1039/c4ra05736h), 2014-07-22
Supplement: c4ra05736h1.pdf [file c4ra05736h1.pdf]

## Supplementary content

### Construction of branched ZnO/TiO<sub>2</sub> nanorod arrays heterostructure for enhancing photovoltaic properties in quantum dot-sensitized solar cells

Bingkun Liu,<sup>a</sup> Yanjun Sun,<sup>a</sup> Dejun Wang,<sup>a,c</sup> Lingling Wang,<sup>\*b</sup> Lijing Zhang,<sup>a</sup> Xueqiang Zhang,<sup>a</sup> Yanhong Lin,<sup>a</sup> and Tengfeng Xie<sup>\*a</sup>

<sup>a</sup> College of Chemistry, Jilin University, Changchun 130012, People's Republic of China.

<sup>b</sup> State Key Laboratory of Supramolecular Structure and Materials, College of Chemistry, Jilin University, Changchun 130012, People's Republic of China.

<sup>c</sup> Department of Chemistry, Tsinghua University, Beijing 100084, People's Republic of China.

\*Corresponding author: xietf@jlu.edu.cn and ltlwll98003082@aliyan.com.

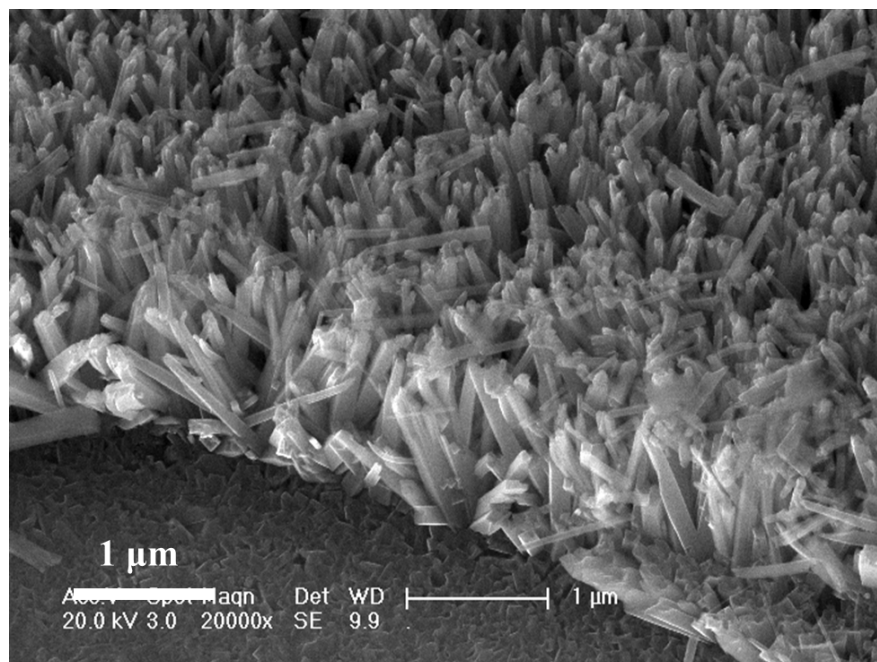

**Fig. S1.** Side view FESEM image of bare TiO<sub>2</sub> nanorod arrays on FTO substrate.

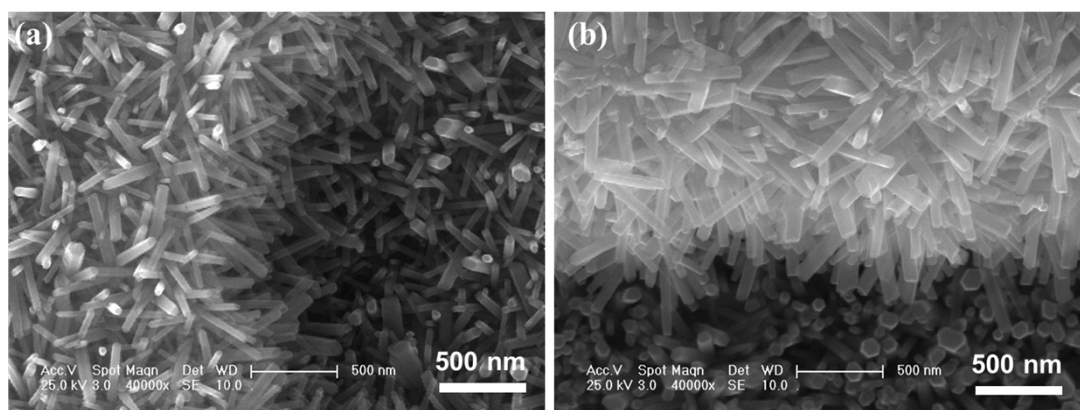

**Fig. S2.** Side view FESEM images of branched ZnO/TiO<sub>2</sub> nanorod arrays on FTO substrate prepared at 85 °C for 4 h.

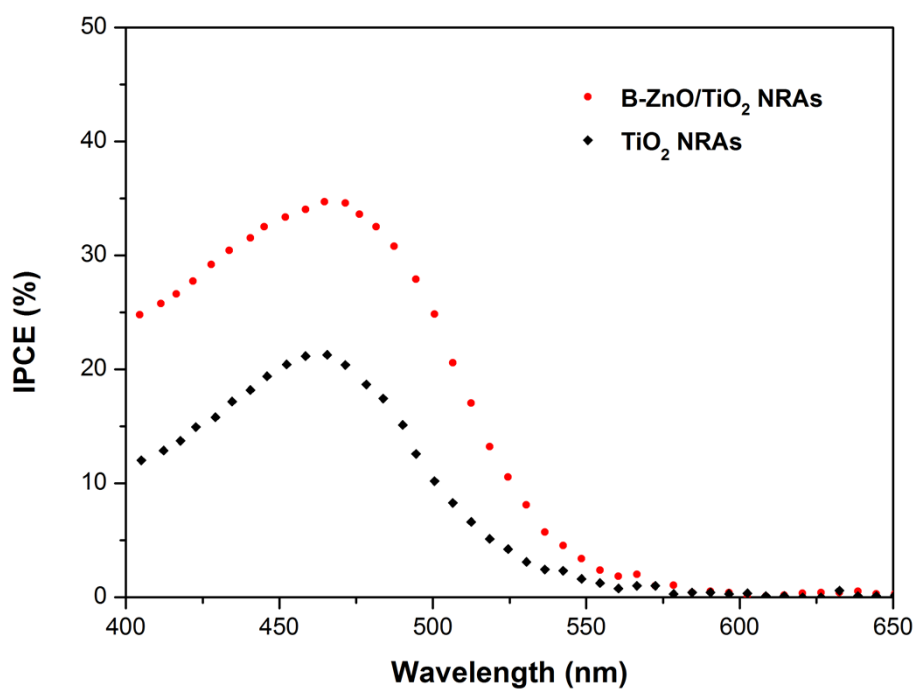

**Fig. S3.** IPCE spectra of CdS-sensitized solar cells assembled with TiO<sub>2</sub> NRAs and B-ZnO/TiO<sub>2</sub> NRAs.
